# Supplementary material
Source: PubMed Central journal article supplement (PMC1456890)
Supplement: 7400619-s1.pdf [file 7400619-s1.pdf]

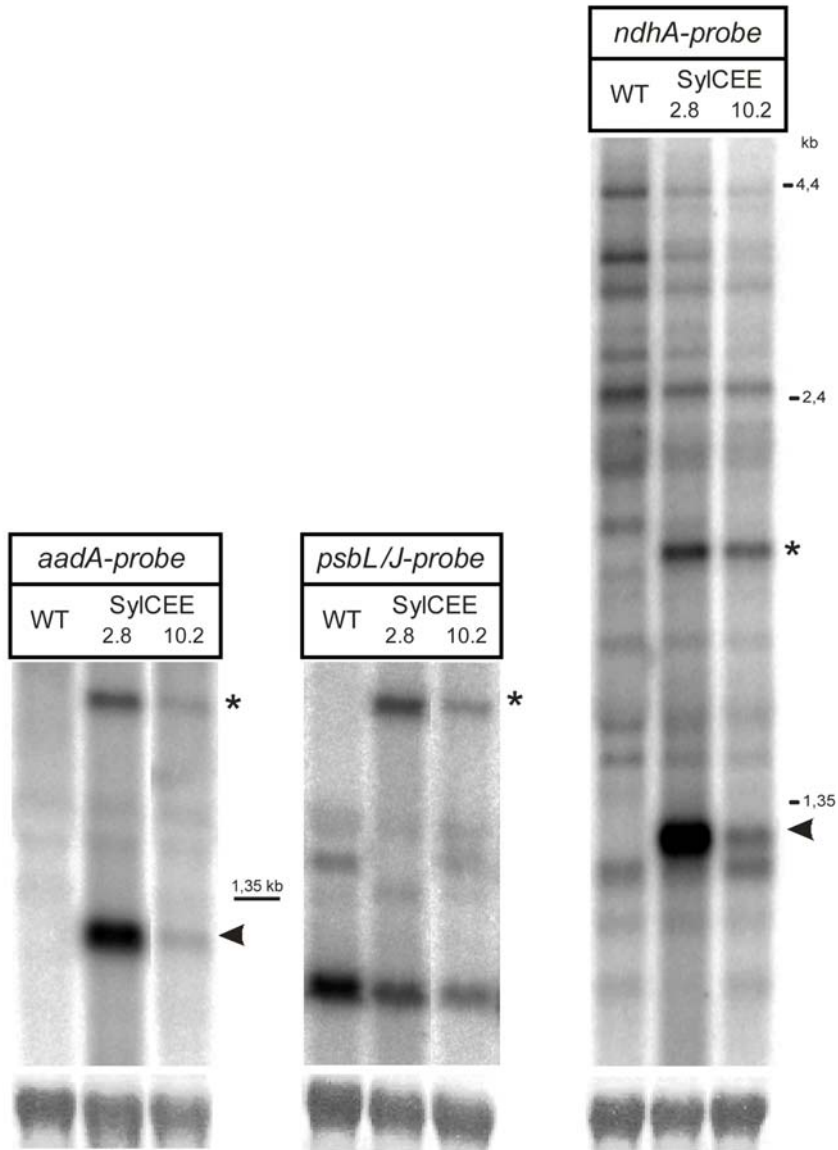

**Supplemental Figure 1: Accumulation of transgenic *ndhA* transcripts in lines SylCEE-2.8 and 10.2**

Five micrograms of total plant RNA from the indicated plant lines were analysed by RNA blot hybridization using strand-specific *aadA*, *psbL/J* and *ndhA* probes. Arrow heads = monocistronic *aadA*/CEE transcripts. Note the stronger signal intensity of the band corresponding to this transcript in line SylCEE-2.8 in comparison to line 10.2. Quantification of the signals for the monocistronic *aadA* transcripts indicated a 4-fold higher amount of these transcripts in SylCEE-10.2. Importantly, the difference in transcript levels is accompanied by the differences in editing efficiency in the two lines (Fig. 1D). Transcripts of ~2.1 kb length detected in all three

hybridization experiments (marked by asterisks) result from read-through transcription initiating at the *psbE* promoter (Bock et al., 1994). Methylene blue stainings of the 16S rRNA shown below each panel demonstrate comparable sample loading in all lanes.

|                          |                                             |
|--------------------------|---------------------------------------------|
| CEE <i>ndhA</i> -189     | ATCTCT- <b>ACTATCTAATA</b> -GTTCAA          |
| tobacco <i>ndhF</i> -97: | CC <b>CACTTACT</b> - <b>TCTATTATG</b> -TCAA |

**Supplemental Figure 2: Homology of the introduced spinach *ndhA* editing site to the endogenous tobacco *ndhF* site.**

The nucleotide regions surrounding the described editing sites of *N. tabacum* and *N. sylvestris* were extracted and subsequently compared with the 20 nt. upstream of CEE *ndhA*-189. Allowing gaps (“-“), the highest similarity was found for site *ndhF*-97 (editing site: bold “C”, identical nt labelled in grey). However, the fact that editing of *ndhF*-97 is not reduced in either *N. tabacum* (Schmitz-Linneweber et al., 2001) or *N. sylvestris* plants (Supplementary Figure 4) overexpressing CEE *ndhA*-189 argues against the two sites being co-edited by the same factors.

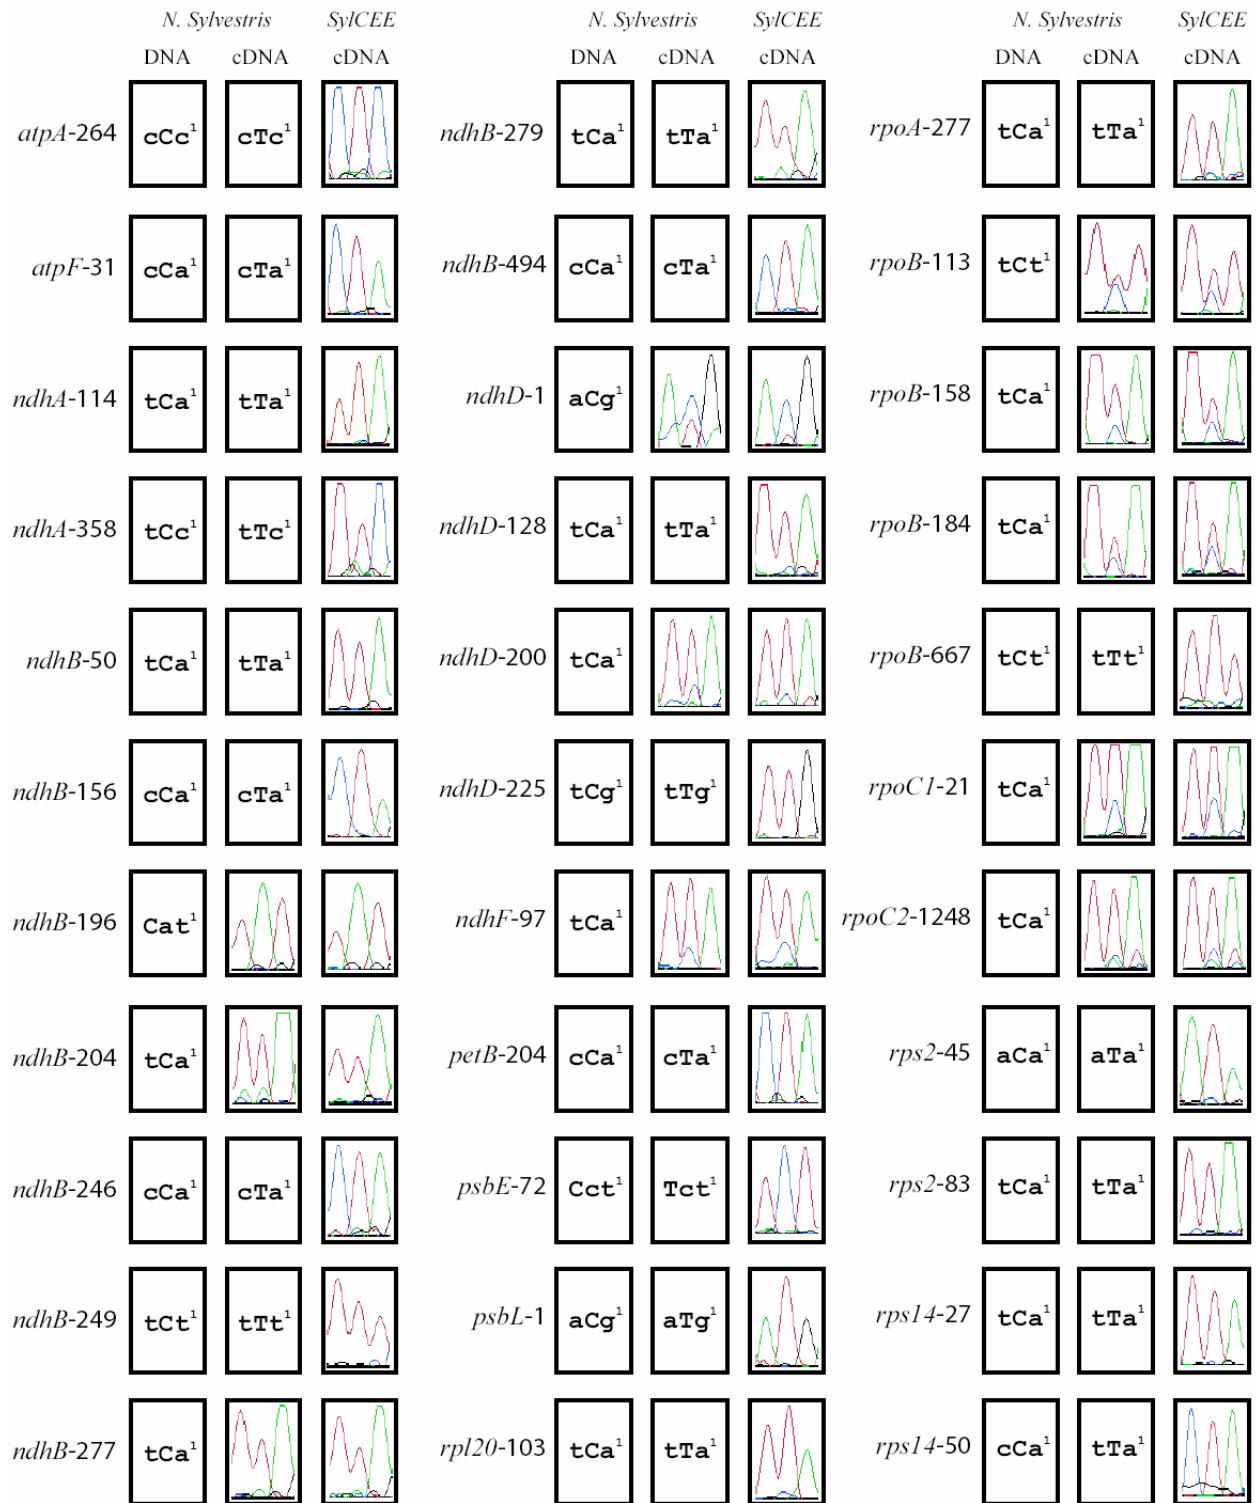

**Supplemental Figure 3: Analysis of all known editing sites in SylCEE plants.**

Analysis of all known editing sites from the SylCEE transcriptome according to Sasaki *et al.* (2003). Editing status was determined by sequencing cDNA-derived PCR products covering the respective areas of interest. Where partial editing was found, complementary data from wild-type

*N. sylvestris* plants were obtained as well. Altogether, no significant reduction in editing relative to wild-type was observed in SylCEE plants.

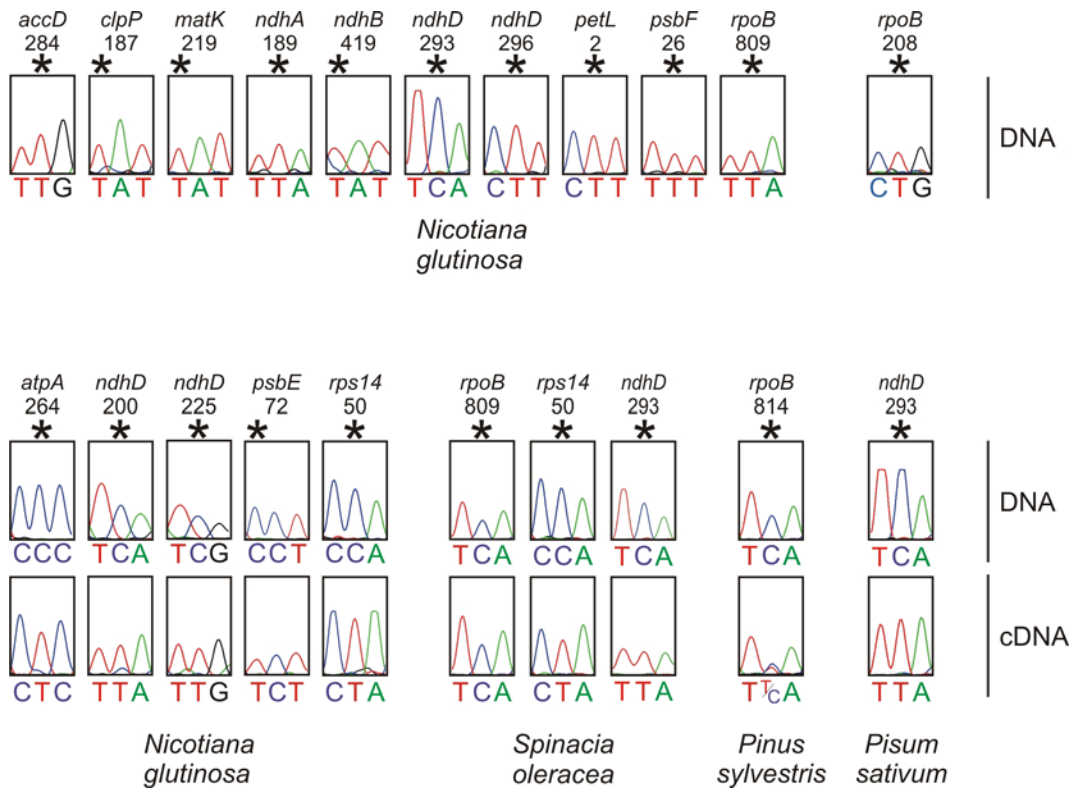

**Supplemental Figure 4: Test for the presence and processing status of several plastid editing sites in different plant species.**

Sequence analysis of *Nicotiana glutinosa* DNA. The chromatogram excerpts show the indicated codon of the given gene. Asterisks mark the position of editing sites known from different angiosperm species and tested for their presence and – if necessary - processing status in species indicated below the chromatograms. The sites analysed in *N. glutinosa* are absent from *Nicotiana tabacum*. For cDNA analysis of *ndhD*-293 in *N. glutinosa* see Fig. 2A.

## Supplemental Table 1: Oligonucleotides

| Plant(s)                                | Target        | Name                  | Sequence                                      | Purpose                                                                            |
|-----------------------------------------|---------------|-----------------------|-----------------------------------------------|------------------------------------------------------------------------------------|
| <i>SylCEE</i>                           | ORF103        | P1a                   | CACACAATTTAAGTAGATGCG                         | check of integration at left border                                                |
|                                         | <i>aadA</i>   | P1b                   | ACTGCGGAGCCGTACAAATG                          |                                                                                    |
|                                         | <i>aadA</i>   | P2a                   | CTGTTCTTATTTTACCGGAGG                         | check of Integration at right border                                               |
|                                         | <i>petA</i>   | P2b                   | CTTTCCAAAAGCTTCAATCTCTCGCATTCTG               |                                                                                    |
|                                         | <i>psbL</i>   | ApsbL                 | TACGACACAATCAAACCCGA                          | probe <i>psbL/J</i>                                                                |
|                                         | <i>psbJ</i>   | AT7psbJ               | GATAATACGACTCACTATAGGGTACTAGAGGGATGAACCCAAT   |                                                                                    |
|                                         | <i>aadA</i>   | aadAli                | GAAGCGGTTATCGCCGAAG                           | probe <i>aadA</i>                                                                  |
|                                         | <i>aadA</i>   | aadAT7                | GTAATCGACTCACTATAGGGAACCGGATCAAAGAGT          |                                                                                    |
|                                         | <i>ndhA</i>   | ndhAfor               | ACAGGAGATACTCGTTTATT                          | probe <i>ndhA</i>                                                                  |
|                                         | <i>ndhA</i>   | AT7ndhA               | GATAATACGACTCACTATAGGGACGAGGTTGTCAATAATAGAT   |                                                                                    |
|                                         | <i>aadA</i>   | P2a                   | see above                                     | amplification and sequencing of introduced <i>ndhA</i> editing site                |
|                                         | CEE           | hindndhAex2rev        | CTTTCCAAAAGCTTCAATCTCTCGCATTCTG               |                                                                                    |
| <i>Syl CEE and Nicotiana sylvestris</i> | <i>atpA</i>   | EcoatpAfor            | TTCCAGAATTCACATTACAATACCTTGCTCC               | amplification and sequencing of <i>N. sylvestris</i> and <i>N. sylvestris</i> cDNA |
|                                         |               | Ecoatparev            | TTCCAGAATTTCTTTCCAAAAGGCGTGAATGC              |                                                                                    |
|                                         | <i>atpF</i>   | atpFforP              | ATGAAAAACGTAACCGATTCC                         |                                                                                    |
|                                         |               | atpFrevP              | TTGTCGGACTTGATTAATCG                          |                                                                                    |
|                                         | <i>ndhA</i>   | ndhAfor               | ACAGGAGATACTCGTTTATT                          |                                                                                    |
|                                         |               | ndhAntex2173 rev      | TGCTACTAATTCTTCTTGCTTCTG                      |                                                                                    |
|                                         |               | tommunedfor           | GATTATCTAACAGTTTAAGTACAGTTGATATAG             |                                                                                    |
|                                         |               | ndhA3' rev            | CTTGTTTGAGACAAGTCGTG                          |                                                                                    |
|                                         | <i>ndhB</i>   | ndhBfor2              | TCATGATCTGGCATGTACAG                          |                                                                                    |
|                                         |               | ndhBedIII             | ATTTCTTGAAGCTCAATCTCTCCCCGGAT                 |                                                                                    |
|                                         |               | nb11                  | TTCATGCTTGTTTGAGTAATAGC                       |                                                                                    |
|                                         |               | ndhBP12               | GATATACCAAGAAAGATGTACG                        |                                                                                    |
|                                         |               | AndhB                 | GTCGTTGCTTTTCTTTCTG                           |                                                                                    |
|                                         |               | ndhB3for              | TCTCTTATCCCTAGGAGGTC                          |                                                                                    |
|                                         |               | ndhBrev2              | CTAAAAAAGGCTATCCTGAGC                         |                                                                                    |
|                                         |               | <i>ndhD</i>           | ndhDStart5'                                   | GGTCCAAGTGATCTTGTC                                                                 |
|                                         | Zagreb7       |                       | GCTCCCATTTTTAATAAAAATTCC                      |                                                                                    |
|                                         | ndhDMitterev  |                       | CTAAAGTAGTGATAAATCCTG                         |                                                                                    |
|                                         | <i>ndhF</i>   | ndhFforP              | GGAACAGACATATGAATATG                          |                                                                                    |
|                                         |               | ndhFrevP              | ATCCCAACATGGAAGTACTG                          |                                                                                    |
|                                         | <i>petB</i>   | petBPfor              | TTCTGTAAATAGGATCACCC                          |                                                                                    |
|                                         |               | petB3' revP           | AATGATTGATTACAAATATTTAG                       |                                                                                    |
|                                         | <i>psbE/L</i> | ApsbE                 | AAGCACAGGAGAACGTTCTG                          |                                                                                    |
|                                         |               | AT7psbL               | GATAATACGACTCACTATAGGGTCTTAATTGAAGAAATAATTGGA |                                                                                    |
|                                         | <i>rpl20</i>  | rpl20edfor            | ATTCGCGAAAGGGGAGTATC                          |                                                                                    |
|                                         |               | rpl20rev3             | ATTTAAATTTATTCTGGTGG                          |                                                                                    |
|                                         | <i>rpoA</i>   | ArpoA                 | GGATTACAAATAGAGAGAAAAT                        |                                                                                    |
|                                         |               | AT7rpoA               | GTAATACGACTCACTATAGGGATTCAAAGGTTCCAACAATGT    |                                                                                    |
|                                         | <i>rpoB</i>   | rpoBforP              | GGAAAAACAGTAGGGATATGC                         |                                                                                    |
|                                         |               | rpoBrevP              | GAAAAATACCGGATCGCCACC                         |                                                                                    |
|                                         |               | rpoBfor2              | TCTTTTAGCAGGTAATGGAG                          |                                                                                    |
|                                         |               | rpoCb4                | GGTTCAAATACCCATGGATT                          |                                                                                    |
|                                         | <i>rpoC1</i>  | rpoC15' for           | AATAATTTTCTTCTATGATCG                         |                                                                                    |
| rpoC15' rev                             |               | AAATAATCCATCTTTTCCG   |                                               |                                                                                    |
| <i>rpoC2</i>                            | ArpoC2        | AGCTAAGCCTTATTTGGCCAC |                                               |                                                                                    |

|                                    |              |                         |                                                   |                                                                       |
|------------------------------------|--------------|-------------------------|---------------------------------------------------|-----------------------------------------------------------------------|
|                                    |              | AT7rpoC2                | GTAATACGACTCACTATAGGGCTCGCTTCAGATATGAAACTTTG      |                                                                       |
| <i>rps2</i>                        |              | rps2forP                | AATGGAATCCTAAAATGGCG                              |                                                                       |
|                                    |              | rps2revP                | CTGGAATTGAAATATCTGCG                              |                                                                       |
| <i>rps14</i>                       |              | Arps14                  | ATGGCAAGGAAAAGTTTGAT                              |                                                                       |
|                                    |              | AT7rps14                | GTAATACGACTCACTATAGGGCCTTACCAACTTGATCTTGTT        |                                                                       |
| <i>Solanaceans<br/>and cybrids</i> | <i>ndhD</i>  | ndhDrev                 | CTCCATTAAGTCCCGTGTCG                              | editing of <i>ndhD</i> -293                                           |
|                                    |              | ndhDmittefor            | CTAAAGTAGTGATAAATCCTG                             |                                                                       |
|                                    | <i>ndhA</i>  | ndhA.nt.ex2.173.<br>rev | TGCTACTAATTCTTCTTCTGCTTCTG                        | editing of <i>ndhA</i> -189                                           |
|                                    |              | ndhAfor                 | ACAGGAGATACTCGTTTATT                              |                                                                       |
| <i>Nicotiana<br/>glutinosa</i>     | <i>accD</i>  | psbL14                  | TTCTCCGAATGAAATTCAAT                              | amplification and<br>sequencing of <i>N. glutinosa</i><br>plastid DNA |
|                                    |              | accDrev                 | AATGGGATCTAGAGAGACC                               |                                                                       |
|                                    |              | accDfor2                | TAATGATCTCGAGGTAACCT                              |                                                                       |
|                                    |              | AT7accD                 | GTAATACGACTCACTATAGGGTGATTTTCTCTCCGACTAC          |                                                                       |
|                                    | <i>atpA</i>  | atpAMittefor            | GAGATCAGAAGCAAATTGTGC                             |                                                                       |
|                                    |              | EcoatpAfor              | TTCCAGAATTCACATTACAATACCTTGCTCC                   |                                                                       |
|                                    |              | EcoatpArev              | TTCCAGAATTCTTTCCAAAAGGCGTGAATGC                   |                                                                       |
|                                    | <i>clpP</i>  | clpPtKo                 | GGGTTGGTTTAGATTGATCC                              |                                                                       |
|                                    |              | clpPex2for              | GTGCGACCAGATGTCCATAC                              |                                                                       |
|                                    |              | clpP.AT.for             | GTAATGATCCATCAACCCGC                              |                                                                       |
|                                    |              | clpP.AT.2rev            | TGAACCGCTACAAGATCAAC                              |                                                                       |
|                                    | <i>matK</i>  | AbmatKfor               | CTTTATCTTCTTTTGAAGGC                              |                                                                       |
|                                    |              | K7                      | AAAAATATCCAAATACCAA                               |                                                                       |
|                                    | <i>ndhA</i>  | ndhA.nt.ex2.173.<br>rev | TGCTACTAATTCTTCTTCTGCTTCTG                        |                                                                       |
|                                    |              | ndhA.nt.in.174.<br>rev  | CCTTTTTACTGCAAATTTAGAAGCCG                        |                                                                       |
|                                    |              | Tommunedfor             | GATTATCTAACAGTTTAAGTACAGTTGATATAG                 |                                                                       |
|                                    |              | ndhA3'rev               | CTTGTTTGAGACAAGTCGTG                              |                                                                       |
|                                    |              | ndhAfor                 | ACAGGAGATACTCGTTTATT                              |                                                                       |
|                                    | <i>ndhB</i>  | AndhB                   | GTCGTTGCTTTTCTTCTG                                |                                                                       |
|                                    |              | ndhBrev2                | CTAAAAAAGGCTATCCTGAGC                             |                                                                       |
|                                    |              | ndhB3for                | TCTCTTATCCCTAGGAGGTC                              |                                                                       |
|                                    | <i>ndhD</i>  | ndhDstart5'             | GGTCCAAGTGATCTTGTG                                |                                                                       |
|                                    |              | ndhDrev                 | CTCCATTAAGTCCCGTGTCG                              |                                                                       |
|                                    |              | Zagreb7                 | GCTCCCATTTTTAATAAAAATTCC                          |                                                                       |
|                                    |              | ndhDMittefor            | AGTACTTGATGCTTCTAGC                               |                                                                       |
|                                    |              | ndhDrev                 | CTCCATTAAGTCCCGTGTCG                              |                                                                       |
|                                    |              | Zagreb6                 | GAATTTTATTAATAAATGGGAGCG                          |                                                                       |
|                                    | <i>petL</i>  | petL5'forP              | ATTTGAAACTTAGGTAAGTGC                             |                                                                       |
|                                    |              | AT7petL                 | GATAATACGACTCACTATAGGGAATCTCAATGACAATGAACA        |                                                                       |
|                                    |              | AT7petG                 | GATAATACGACTCACTATAGGGTAAATTAATCAAAGGTCCAA        |                                                                       |
|                                    | <i>psbF</i>  | ApsbE                   | AAGCACAGGAGAACGTTCTG                              |                                                                       |
|                                    |              | AT7psbL                 | GATAATACGACTCACTATAGGGTCTTAATTGAAGAAATAATTG<br>GA |                                                                       |
|                                    | <i>rpoB</i>  | rpoBforP                | GGAAAAACAGTAGGGATATGC                             |                                                                       |
|                                    |              | rpoBrevP                | GAAAATACCGGATCGCCACC                              |                                                                       |
|                                    |              | rpoBfor2                | TCTTTTAGCAGGTAATGGAG                              |                                                                       |
|                                    |              | rpoCb4                  | GGTTCAAATACCCATGGATT                              |                                                                       |
|                                    | <i>rps14</i> | Arps14                  | ATGGCAAGGAAAAGTTTGAT                              |                                                                       |
|                                    |              | AT7rps14                | GTAATACGACTCACTATAGGGCCTTACCAACTTGATCTTGTT        |                                                                       |
